# Supplementary material for: The torso-like gene functions to maintain the structure of the vitelline membrane in Nasonia vitripennis, implying its co-option into Drosophila axis formation
Source: PubMed Central journal article supplement (PMC6777369; doi:10.1242/bio.046284), 2019-09-05
Supplement: biolopen-8-046284-s1.pdf [file biolopen-8-046284-s1.pdf]

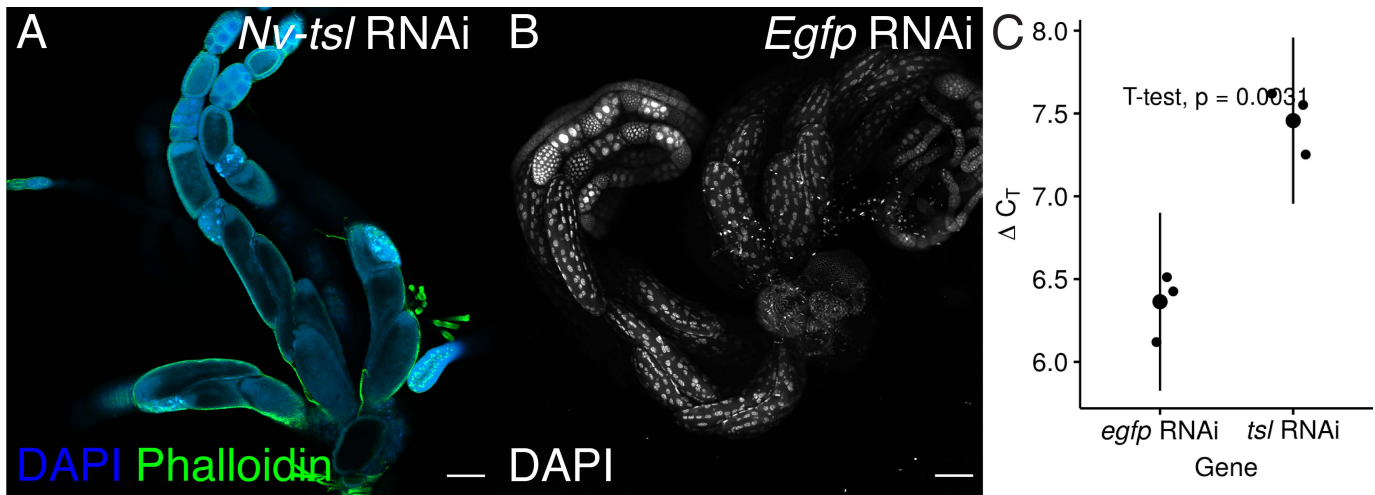

**Figure S1: *Nv-tsl* RNAi knockdown in ovaries and qPCR.**

A) Phalloidin and DAPI stained ovaries from *Nv-tsl* RNAi treated *Nasonia*

B) DAPI stained *Egfp*-RNAi treated ovary. Scale bars are 100  $\mu\text{m}$

C) qPCR quantitation of *Nv-tsl* RNA in *Egfp* RNAi and *Nv-tsl* RNAi injected *Nasonia* expressed as  $\Delta CT$ . *Nv-tsl* RNAi treated tissues have a higher  $\Delta CT$  indicating significantly reduced amounts of *Nv-tsl* RNA.



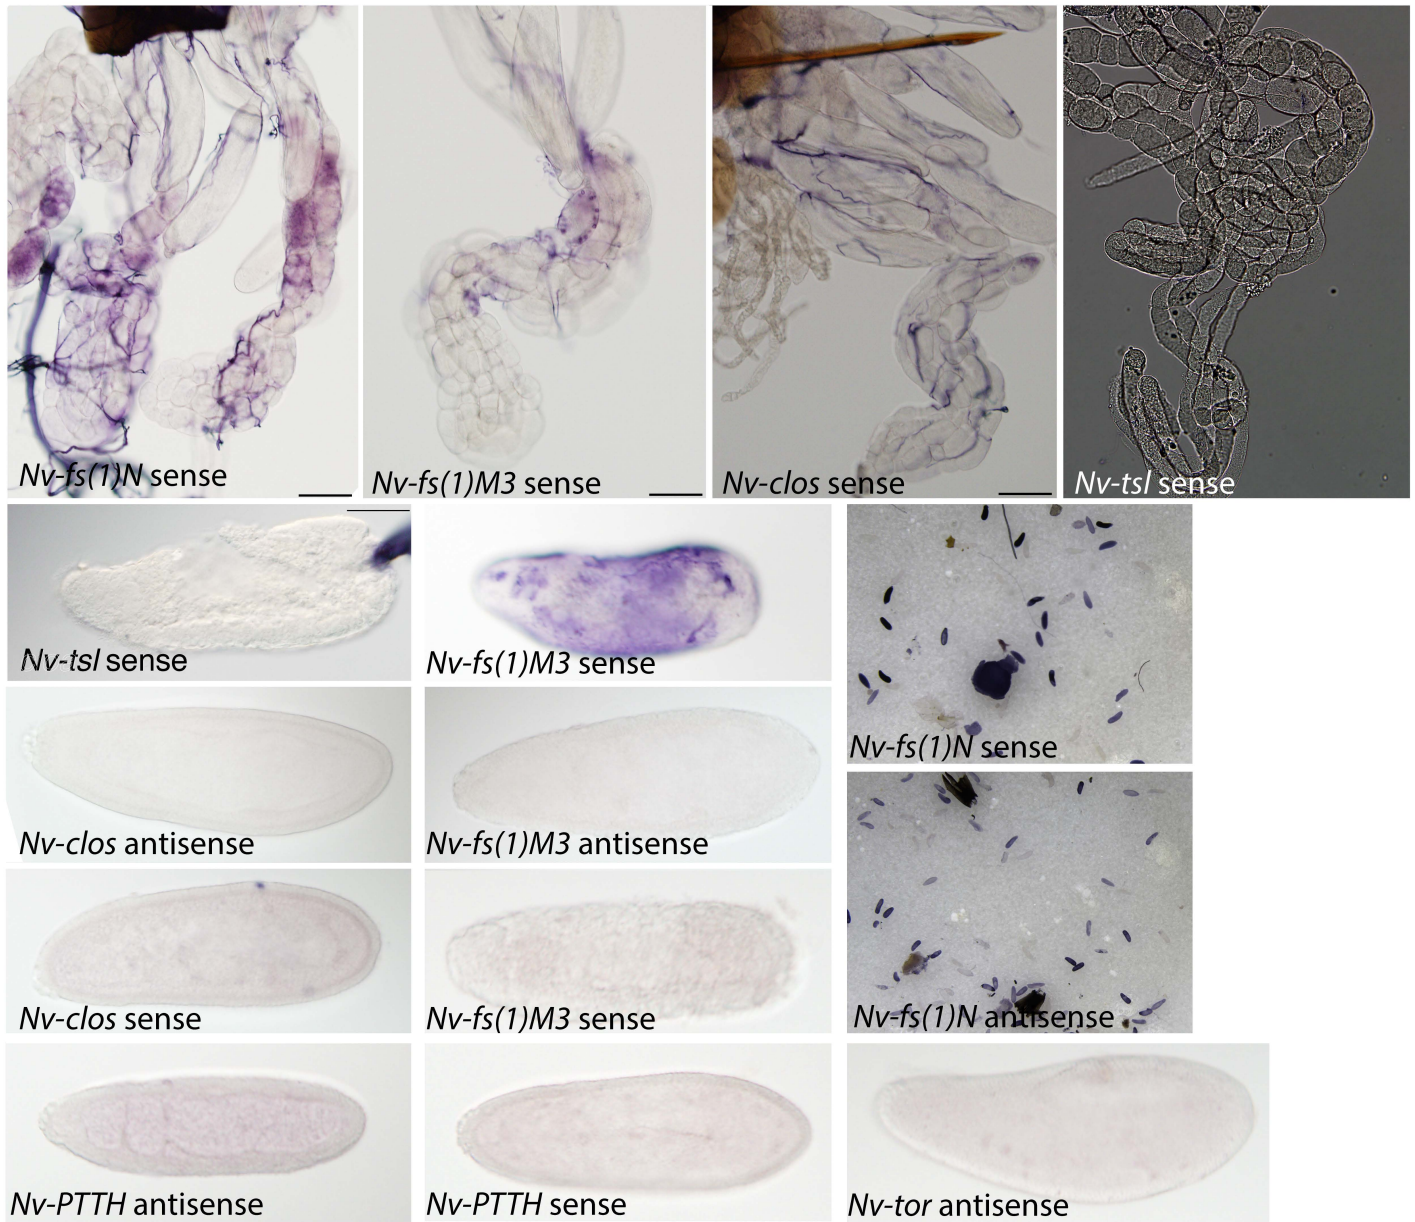

**Figure S3:** Sense (negative) controls for *in-situ* hybridisation in ovaries and embryos. Antisense staining in embryos (showing no expression) for *Nv-fs(1)N*, *Nv-fs(1)M3*, *Nv-closca*, *Nv-PTTH* and *Nv-tor*. Embryos are oriented with anterior to the left.

Table S1: Sequences of clones used in this analysis.

[Click here to Download Table S1](#)

Table S2: PCR primers used in this analysis

[Click here to Download Table S2](#)

Table S3: ClustalW alignment of insect fs(1)N, fs(1)M3, and clos proteins

[Click here to Download Table S3](#)
